# Supplementary material
Source: Springer Nature journal article supplement (https://www.springermedizin.de/resource/supplementary/12885_2008_1400_MOESM2_ESM.pdf/9473032)

## Post therapy Kab 201 pharmacokinetics

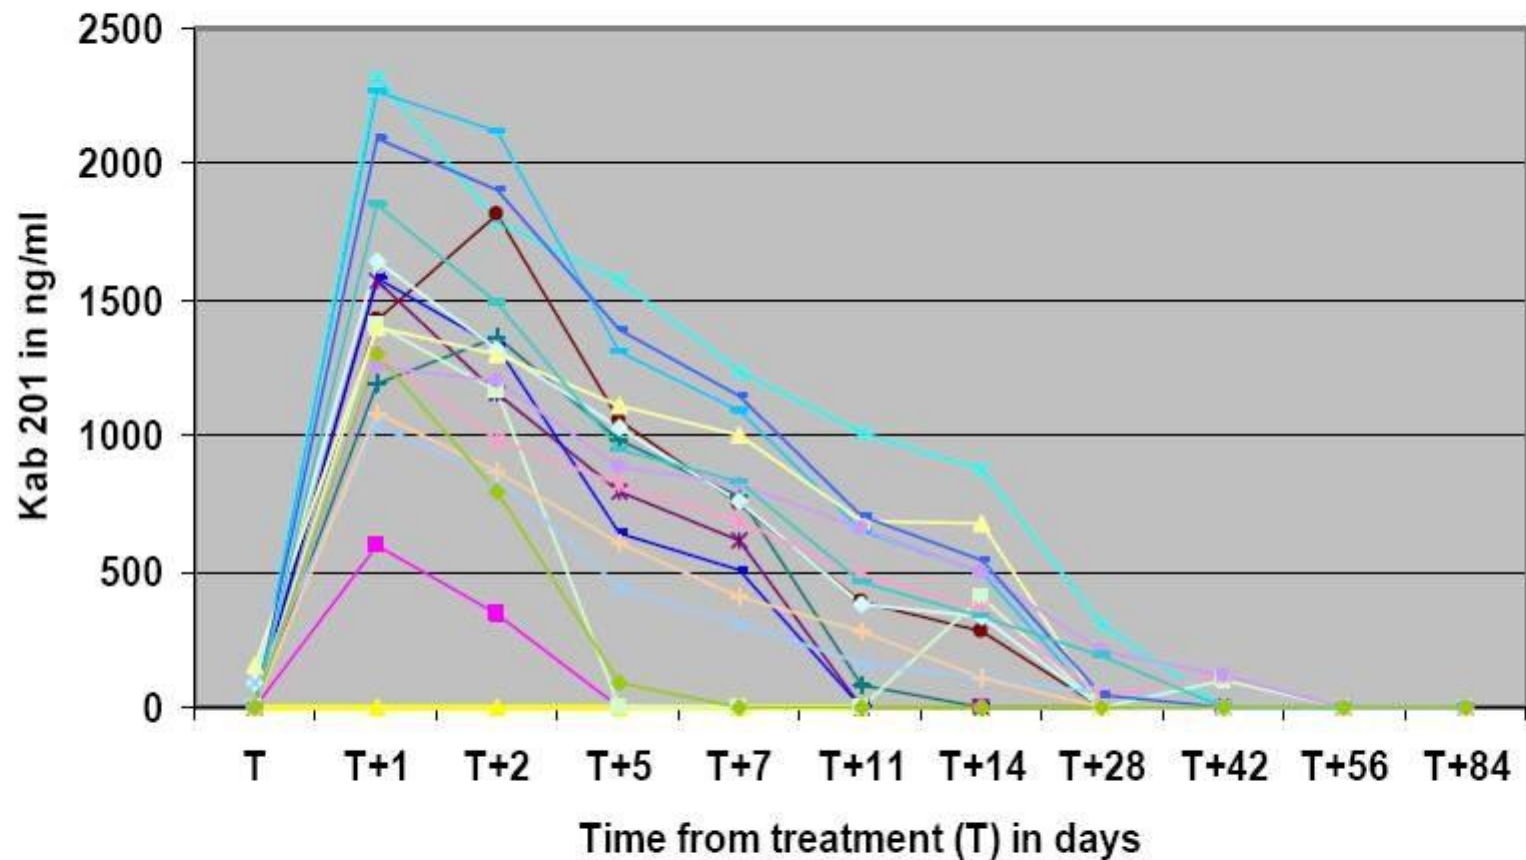

Key: ng = nanograms

Supplement: MOESM2 [file 9473032]
